# Supplementary material
Source: Research Square preprint supplement (doi:10.21203/rs.3.rs-8635370/v1)
Supplement: Supplementary file 1 [file aa9410341d7c8a5b5b2601c8.pdf]

**Supplementary Table S1.** Complete results of multiple regression analyses predicting year 2 noncognitive skills from year 1 subscales of the Japanese version of the Academic Motivation Scale (AMS-J)

| <b>Panel A. dispositional resilience</b> |             |           |          |          |                                |            |
|------------------------------------------|-------------|-----------|----------|----------|--------------------------------|------------|
| <b>Predictor (AMS-J)</b>                 | <b>Est.</b> | <b>SE</b> | <b>t</b> | <b>p</b> | <b>Std. <math>\beta</math></b> | <b>VIF</b> |
| <b>Intercept</b>                         | 26.336      | 7.005     | 3.76     | <.001    | –                              | –          |
| <b>AMOT</b>                              | 0.095       | 0.223     | 0.43     | 0.670    | 0.045                          | 1.51       |
| <b>EMER</b>                              | -0.015      | 0.183     | -0.08    | 0.933    | -0.010                         | 1.83       |
| <b>EMIN</b>                              | 0.010       | 0.184     | 0.06     | 0.955    | 0.007                          | 2.27       |
| <b>EMID</b>                              | 0.507       | 0.423     | 1.20     | 0.232    | 0.152                          | 2.16       |
| <b>IM</b>                                | 0.396       | 0.308     | 1.29     | 0.201    | 0.167                          | 2.28       |
| <b>NAM–E</b>                             | 0.012       | 0.145     | 0.08     | 0.936    | 0.008                          | 1.47       |
| <b>NAM–Ex</b>                            | -0.405      | 0.242     | -1.67    | 0.098    | -0.192                         | 1.78       |

  

| <b>Panel B. Acquired resilience</b> |             |           |          |          |                                |            |
|-------------------------------------|-------------|-----------|----------|----------|--------------------------------|------------|
| <b>Predictor (AMS-J)</b>            | <b>Est.</b> | <b>SE</b> | <b>t</b> | <b>p</b> | <b>Std. <math>\beta</math></b> | <b>VIF</b> |
| <b>Intercept</b>                    | 21.374      | 4.301     | 4.97     | <.001    | –                              | –          |
| <b>AMOT</b>                         | 0.030       | 0.137     | 0.22     | 0.826    | 0.023                          | 1.51       |
| <b>EMER</b>                         | 0.282       | 0.112     | 2.51     | 0.013    | 0.284                          | 1.83       |
| <b>EMIN</b>                         | -0.170      | 0.113     | -1.51    | 0.135    | -0.189                         | 2.27       |
| <b>EMID</b>                         | 0.269       | 0.259     | 1.04     | 0.303    | 0.127                          | 2.16       |
| <b>IM</b>                           | 0.304       | 0.189     | 1.61     | 0.110    | 0.203                          | 2.28       |
| <b>NAM–E</b>                        | -0.018      | 0.089     | -0.20    | 0.839    | -0.021                         | 1.47       |
| <b>NAM–Ex</b>                       | -0.247      | 0.149     | -1.66    | 0.100    | -0.185                         | 1.78       |

  

| <b>Panel C. Social skills</b> |             |           |          |          |                                |            |
|-------------------------------|-------------|-----------|----------|----------|--------------------------------|------------|
| <b>Predictor (AMS-J)</b>      | <b>Est.</b> | <b>SE</b> | <b>t</b> | <b>p</b> | <b>Std. <math>\beta</math></b> | <b>VIF</b> |
| <b>Intercept</b>              | 34.394      | 8.619     | 3.99     | <.001    | –                              | –          |
| <b>AMOT</b>                   | 0.341       | 0.274     | 1.25     | 0.215    | 0.132                          | 1.51       |
| <b>EMER</b>                   | 0.288       | 0.225     | 1.28     | 0.202    | 0.150                          | 1.83       |
| <b>EMIN</b>                   | -0.227      | 0.227     | -1.00    | 0.320    | -0.130                         | 2.27       |
| <b>EMID</b>                   | 0.882       | 0.520     | 1.70     | 0.093    | 0.215                          | 2.16       |
| <b>IM</b>                     | 0.413       | 0.379     | 1.09     | 0.278    | 0.142                          | 2.28       |
| <b>NAM–E</b>                  | -0.031      | 0.178     | -0.17    | 0.862    | -0.018                         | 1.47       |
| <b>NAM–Ex</b>                 | -0.366      | 0.298     | -1.23    | 0.222    | -0.141                         | 1.78       |

Note: Est., estimate; SE, standard error; Std.  $\beta$ , standardized beta; VIF, variance inflation factor. Predictor abbreviations: AMOT, amotivation; EMER, extrinsic motivation – external regulation; EMIN, extrinsic motivation – introjected regulation; EMID, extrinsic motivation – identified regulation; IM, intrinsic motivation; NAM–E, non-academic motivation – enjoyment of youth; NAM–EX, non-academic motivation – expectations of others.

**Supplementary Table S2.** Complete results of multiple regression analyses predicting changes in noncognitive skills from year 1 subscales of the Japanese version of the Academic Motivation Scale (AMS-J)

| <b>ΔDispositional resilience</b> |             |           |          |          |               |            |
|----------------------------------|-------------|-----------|----------|----------|---------------|------------|
| <b>Predictor (AMS-J)</b>         | <b>Est.</b> | <b>SE</b> | <b>t</b> | <b>p</b> | <b>Std. β</b> | <b>VIF</b> |
| <b>Intercept</b>                 | 10.38       | 5.525     | 1.88     | 0.063    | 0             |            |
| <b>AMOT</b>                      | -0.028      | 0.176     | -0.16    | 0.875    | -0.017        | 1.51       |
| <b>EMER</b>                      | 0.265       | 0.144     | 1.84     | 0.068    | 0.217         | 1.83       |
| <b>EMIN</b>                      | -0.083      | 0.146     | -0.57    | 0.571    | -0.075        | 2.27       |
| <b>EMID</b>                      | -0.428      | 0.333     | -1.29    | 0.201    | -0.165        | 2.16       |
| <b>IM</b>                        | -0.199      | 0.243     | -0.82    | 0.415    | -0.108        | 2.28       |
| <b>NAM-E</b>                     | -0.055      | 0.114     | -0.49    | 0.628    | -0.051        | 1.47       |
| <b>NAM-Ex</b>                    | -0.189      | 0.191     | -0.99    | 0.324    | -0.115        | 1.78       |

  

| <b>ΔAcquired resilience</b> |             |           |          |          |               |            |
|-----------------------------|-------------|-----------|----------|----------|---------------|------------|
| <b>Predictor (AMS-J)</b>    | <b>Est.</b> | <b>SE</b> | <b>t</b> | <b>p</b> | <b>Std. β</b> | <b>VIF</b> |
| <b>Intercept</b>            | 8.406       | 4.099     | 2.05     | 0.043    | 0             |            |
| <b>AMOT</b>                 | -0.095      | 0.130     | -0.73    | 0.466    | -0.077        | 1.51       |
| <b>EMER</b>                 | 0.254       | 0.107     | 2.38     | 0.019    | 0.274         | 1.83       |
| <b>EMIN</b>                 | -0.221      | 0.108     | -2.05    | 0.043    | -0.263        | 2.27       |
| <b>EMID</b>                 | -0.318      | 0.247     | -1.29    | 0.201    | -0.161        | 2.16       |
| <b>IM</b>                   | -0.199      | 0.180     | -1.10    | 0.272    | -0.142        | 2.28       |
| <b>NAM-E</b>                | 0.051       | 0.085     | 0.60     | 0.548    | 0.062         | 1.47       |
| <b>NAM-Ex</b>               | -0.049      | 0.142     | -0.35    | 0.731    | -0.039        | 1.78       |

  

| <b>ΔSocial skills</b>    |             |           |          |          |               |            |
|--------------------------|-------------|-----------|----------|----------|---------------|------------|
| <b>Predictor (AMS-J)</b> | <b>Est.</b> | <b>SE</b> | <b>t</b> | <b>p</b> | <b>Std. β</b> | <b>VIF</b> |
| <b>Intercept</b>         | 7.154       | 8.992     | 0.80     | 0.428    | 0             |            |
| <b>AMOT</b>              | 0.134       | 0.286     | 0.47     | 0.64     | 0.050         | 1.51       |
| <b>EMER</b>              | 0.443       | 0.234     | 1.89     | 0.061    | 0.224         | 1.83       |
| <b>EMIN</b>              | -0.464      | 0.237     | -1.96    | 0.052    | -0.259        | 2.27       |
| <b>EMID</b>              | -0.678      | 0.542     | -1.25    | 0.214    | -0.161        | 2.16       |
| <b>IM</b>                | 0.088       | 0.395     | 0.22     | 0.824    | 0.029         | 2.28       |
| <b>NAM-E</b>             | 0.067       | 0.186     | 0.36     | 0.717    | 0.039         | 1.47       |
| <b>NAM-Ex</b>            | -0.117      | 0.311     | -0.38    | 0.708    | -0.044        | 1.78       |

Note: Est., estimate; SE, standard error; Std. β, standardized beta; VIF, variance inflation factor. Predictor abbreviations: AMOT, amotivation; EMER, extrinsic motivation – external regulation; EMIN, extrinsic motivation – introjected regulation; EMID, extrinsic motivation – identified regulation; IM, intrinsic motivation; NAM-E, non-academic motivation – enjoyment of youth; NAM-EX, non-academic motivation – expectations of others.

**Supplementary Table S3.** Complete results of multiple regression analyses predicting changes in noncognitive skills from the changes in the subscales of the Japanese version of the Academic Motivation Scale (AMS-J)

| <b>Panel A. <math>\Delta</math>dispositional resilience</b> |             |           |          |          |                                |            |
|-------------------------------------------------------------|-------------|-----------|----------|----------|--------------------------------|------------|
| <b>Predictor (<math>\Delta</math>AMS-J)</b>                 | <b>Est.</b> | <b>SE</b> | <b>t</b> | <b>p</b> | <b>Std. <math>\beta</math></b> | <b>VIF</b> |
| <b>Intercept</b>                                            | 0.108       | 0.558     | 0.19     | 0.847    | –                              | –          |
| <b>AMOT</b>                                                 | 0.086       | 0.113     | 0.77     | 0.444    | 0.065                          | 1.32       |
| <b>EMER</b>                                                 | -0.001      | 0.118     | -0.01    | 0.991    | -0.001                         | 1.81       |
| <b>EMIN</b>                                                 | -0.033      | 0.119     | -0.27    | 0.784    | -0.029                         | 1.99       |
| <b>EMID</b>                                                 | 0.258       | 0.196     | 1.31     | 0.191    | 0.142                          | 2.13       |
| <b>IM</b>                                                   | 0.614       | 0.164     | 3.74     | 0.003    | 0.404                          | 2.13       |
| <b>NAM–E</b>                                                | 0.229       | 0.104     | 2.21     | 0.029    | 0.212                          | 1.68       |
| <b>NAM–Ex</b>                                               | -0.201      | 0.157     | -1.28    | 0.203    | -0.124                         | 1.71       |

  

| <b>Panel B. <math>\Delta</math>Acquired resilience</b> |             |           |          |          |                                |            |
|--------------------------------------------------------|-------------|-----------|----------|----------|--------------------------------|------------|
| <b>Predictor (<math>\Delta</math>AMS-J)</b>            | <b>Est.</b> | <b>SE</b> | <b>t</b> | <b>p</b> | <b>Std. <math>\beta</math></b> | <b>VIF</b> |
| <b>Intercept</b>                                       | 0.483       | 0.448     | 1.08     | 0.283    | –                              | –          |
| <b>AMOT</b>                                            | 0.032       | 0.090     | 0.35     | 0.727    | 0.031                          | 1.32       |
| <b>EMER</b>                                            | -0.025      | 0.095     | -0.27    | 0.791    | -0.028                         | 1.81       |
| <b>EMIN</b>                                            | 0.048       | 0.096     | 0.50     | 0.620    | 0.055                          | 1.99       |
| <b>EMID</b>                                            | 0.358       | 0.157     | 2.28     | 0.025    | 0.260                          | 2.13       |
| <b>IM</b>                                              | 0.356       | 0.132     | 2.71     | 0.008    | 0.309                          | 2.13       |
| <b>NAM–E</b>                                           | 0.011       | 0.083     | 0.13     | 0.897    | 0.013                          | 1.68       |
| <b>NAM–Ex</b>                                          | -0.109      | 0.126     | -0.86    | 0.389    | -0.088                         | 1.71       |

  

| <b>Panel C. <math>\Delta</math>Social skills</b> |             |           |          |          |                                |            |
|--------------------------------------------------|-------------|-----------|----------|----------|--------------------------------|------------|
| <b>Predictor (<math>\Delta</math>AMS-J)</b>      | <b>Est.</b> | <b>SE</b> | <b>t</b> | <b>p</b> | <b>Std. <math>\beta</math></b> | <b>VIF</b> |
| <b>Intercept</b>                                 | 1.327       | 0.951     | 1.40     | 0.166    | –                              | –          |
| <b>AMOT</b>                                      | 0.105       | 0.192     | 0.55     | 0.584    | 0.049                          | 1.32       |
| <b>EMER</b>                                      | -0.079      | 0.201     | -0.39    | 0.695    | -0.041                         | 1.81       |
| <b>EMIN</b>                                      | 0.201       | 0.203     | 0.99     | 0.325    | 0.109                          | 1.99       |
| <b>EMID</b>                                      | 0.010       | 0.334     | 0.03     | 0.976    | 0.003                          | 2.13       |
| <b>IM</b>                                        | 0.856       | 0.280     | 3.06     | 0.003    | 0.348                          | 2.13       |
| <b>NAM–E</b>                                     | 0.418       | 0.177     | 2.37     | 0.020    | 0.239                          | 1.68       |
| <b>NAM–Ex</b>                                    | -0.273      | 0.267     | -1.02    | 0.309    | -0.104                         | 1.71       |

Note: Est., estimate; SE, standard error; Std.  $\beta$ , standardized beta; VIF, variance inflation factor.

Predictor abbreviations: AMOT, amotivation; EMER, extrinsic motivation – external regulation;

EMIN, extrinsic motivation – introjected regulation; EMID, extrinsic motivation – identified

regulation; IM, intrinsic motivation; NAM–E, non-academic motivation – enjoyment of youth;

NAM–EX, non-academic motivation – expectations of others.
